# Supplementary material for: First Report on Detection and Complete Genomic Analysis of a Novel CRESS DNA Virus from Sea Turtles
Source: MDPI journal article supplement (doi:10.3390/pathogens12040601), 2023-04-15
Supplement: s1 [file s1]

**Supplementary Table S1.** Details of the cloacal samples obtained from sea turtles in coastal waters around the Caribbean Islands of St. Kitts and Nevis. The samples that tested positive for CRESS DNA viruses are highlighted with yellow.

| Sample/sea turtle number | Sea turtle species | Sampling <sup>1</sup> /Rescue <sup>2</sup> location | Month, year of collection | Lesions/Presence of epibiota |
|--------------------------|--------------------|-----------------------------------------------------|---------------------------|------------------------------|
| T1 <sup>3</sup>          | Green              | South Friars Beach <sup>1</sup>                     | July, 2021                | Epibiota                     |
| T2                       | Green              | Whitehouse Bay <sup>1</sup>                         | December, 2021            | Cutaneous lesions            |
| T3 <sup>4</sup>          | Hawksbill          | Whitehouse Bay <sup>1</sup>                         | November, 2021            | Epibiota                     |
| T4                       | Green              | South Friars Beach <sup>1</sup>                     | November, 2021            | Epibiota                     |
| T5                       | Green              | Whitehouse Bay <sup>1</sup>                         | February, 2022            | Epibiota                     |
| T6                       | Hawksbill          | South Friars Beach <sup>1</sup>                     | January, 2022             | Epibiota                     |
| T7                       | Hawksbill          | Whitehouse Bay <sup>1</sup>                         | November, 2021            | Epibiota                     |
| T8                       | Green              | South Friars Beach <sup>1</sup>                     | January, 2022             | Epibiota                     |
| T9                       | Green              | Whitehouse Bay <sup>1</sup>                         | November, 2021            | Epibiota                     |
| T10                      | Green              | South Friars Beach <sup>1</sup>                     | November, 2021            | Epibiota                     |
| T11                      | Green              | Shitten Bay <sup>1</sup>                            | October, 2021             | Epibiota                     |
| T12 <sup>5</sup>         | Green              | South Friars Beach <sup>1</sup>                     | September, 2021           | Epibiota                     |
| T13                      | Green              | South Friars Beach <sup>1</sup>                     | October, 2021             | Epibiota                     |
| T14                      | Green              | South Friars Beach <sup>1</sup>                     | October, 2021             | Epibiota                     |
| T15                      | Hawksbill          | Shitten bay <sup>1</sup>                            | February, 2022            | Epibiota                     |
| T16                      | Green              | Shitten bay <sup>1</sup>                            | February, 2022            | Epibiota                     |
| T17                      | Hawksbill          | Timothy Beach <sup>1</sup>                          | March, 2022               | Epibiota                     |
| T18                      | Green              | South Friars Beach <sup>1</sup>                     | April, 2022               | Epibiota                     |
| T19 <sup>3</sup>         | Green              | South Friars Beach <sup>1</sup>                     | April, 2022               | Epibiota                     |
| T20 <sup>4</sup>         | Hawksbill          | Whitehouse Bay <sup>1</sup>                         | April, 2022               | Epibiota                     |
| T21 <sup>5</sup>         | Green              | South Friars Beach <sup>1</sup>                     | April, 2022               | Cutaneous lesions            |
| T22                      | Green              | South Friars Beach <sup>1</sup>                     | April, 2022               | Epibiota                     |
| T23                      | Green              | South Friars Beach <sup>1</sup>                     | April, 2022               | Epibiota                     |
| T24                      | Hawksbill          | South Friars Beach <sup>1</sup>                     | April, 2022               | Epibiota                     |
| T25                      | Hawksbill          | South Friars Beach <sup>1</sup>                     | April, 2022               | Epibiota                     |
| T26                      | Green              | South Friars Beach <sup>1</sup>                     | July, 2022                | Epibiota                     |
| T27                      | Green              | Whitehouse Bay <sup>1</sup>                         | June, 2022                | Epibiota                     |
| T28                      | Green              | South Friars Beach <sup>1</sup>                     | May, 2022                 | Epibiota                     |
| T29                      | Green              | South Friars Beach <sup>1</sup>                     | August, 2022              | Epibiota                     |
| T30                      | Green              | South Friars Beach <sup>1</sup>                     | May, 2022                 | Epibiota                     |
| T31                      | Hawksbill          | Whitehouse Bay <sup>1</sup>                         | July, 2022                | Epibiota                     |
| T32 <sup>6</sup>         | Loggerhead         | Caribbean Sea <sup>2, 6</sup>                       | June, 2021 <sup>6</sup>   | Boat strike injury           |
| T33 <sup>7</sup>         | Loggerhead         | New River Ghaut <sup>2, 7</sup>                     | June, 2021 <sup>7</sup>   | Flipper injury               |
| T34 <sup>8</sup>         | Hawksbill          | South Friars Beach <sup>2, 8</sup>                  | June, 2021 <sup>8</sup>   | Hook injury                  |

<sup>1</sup> Sampling location

<sup>2</sup> Rescue location

<sup>3-5</sup> Sea turtles sampled twice during the study period: T1 <sup>3</sup> and T19 <sup>3</sup>, T3 <sup>4</sup> and T20 <sup>4</sup>, and T12 <sup>5</sup> and T21 <sup>5</sup>.

<sup>6</sup> Sea turtle T32 was struck by a boat in the Caribbean Sea surrounding St. Kitts and Nevis, rescued by a local fisherman, and rehabilitated by the St. Kitts Sea Turtle Monitoring Network (SKSTMN). The cloacal sample was collected in captivity during rehabilitation in June of 2021.

<sup>7</sup> Sea turtle T33 was stranded due to flipper injury at New River Ghaut in October of 2019. The sea turtle was sampled in captivity before release from rehabilitation by the SKSTMN in June of 2021.

<sup>8</sup> Sea turtle T34 was found on the South Friars Beach and presented for removal of a hook. The cloacal sample was collected in captivity during rehabilitation by the SKSTMN in June of 2021.
